# Supplementary material
Source: publisher figshare collection journal article supplement (https://acs.figshare.com/ndownloader/files/12856859)
Supplement: Supplementary file 1 [file 12856859]

## Supporting Information

# Thermogel Loaded with Low-Dose Paclitaxel as a Facile Coating to Alleviate Periprosthetic Fibrous Capsule Formation

*Jiabin Luan,<sup>†,§</sup> Zheng Zhang,<sup>‡,§</sup> Wenjia Shen,<sup>†</sup> Yipei Chen,<sup>†</sup> Xiaowei Yang,<sup>†</sup> Xiaobin Chen,<sup>†</sup> Lin Yu,<sup>\*,†</sup> Jian Sun,<sup>\*,†,‡</sup> and Jiandong Ding<sup>†</sup>*

<sup>†</sup> State Key Laboratory of Molecular Engineering of Polymers, Department of Macromolecular Science, Fudan University, Shanghai 200438, China

<sup>‡</sup> Department of Breast Surgery, Obstetrics and Gynecology Hospital, Fudan University, Shanghai 200011, China

Corresponding Authors

\*E-mail address: yu\_lin@fudan.edu.cn (L. Yu)

\*E-mail address: surgian@163.com (J. Sun)

§ Authors contributed equally.

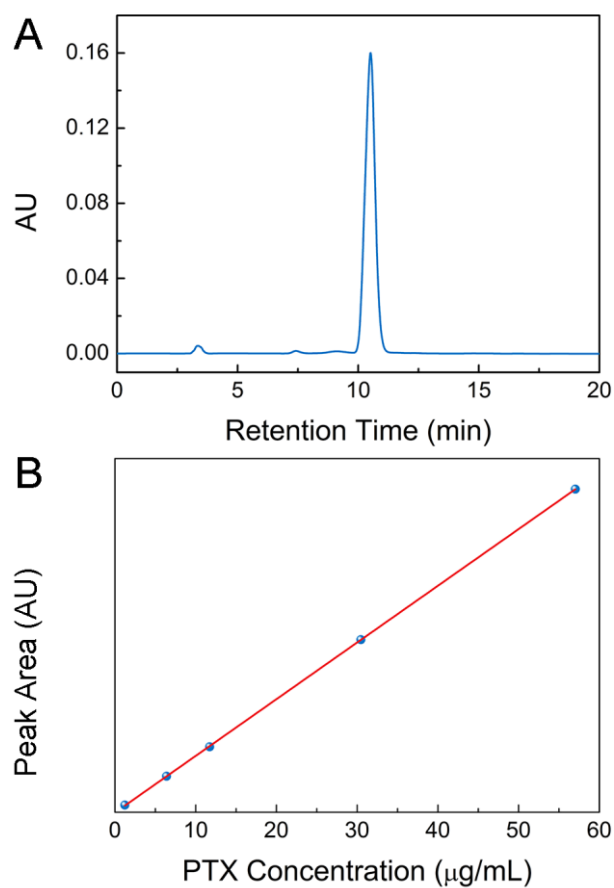

**Figure S1.** (A) HPLC chromatogram of the PTX. The mobile phase was 50% acetonitrile and 50% water and the retention time of PTX was 10.2 min. (B) The linear fitting of the drug concentration of the PTX versus the peak area of UV absorption. The correlation coefficient was 0.99998.

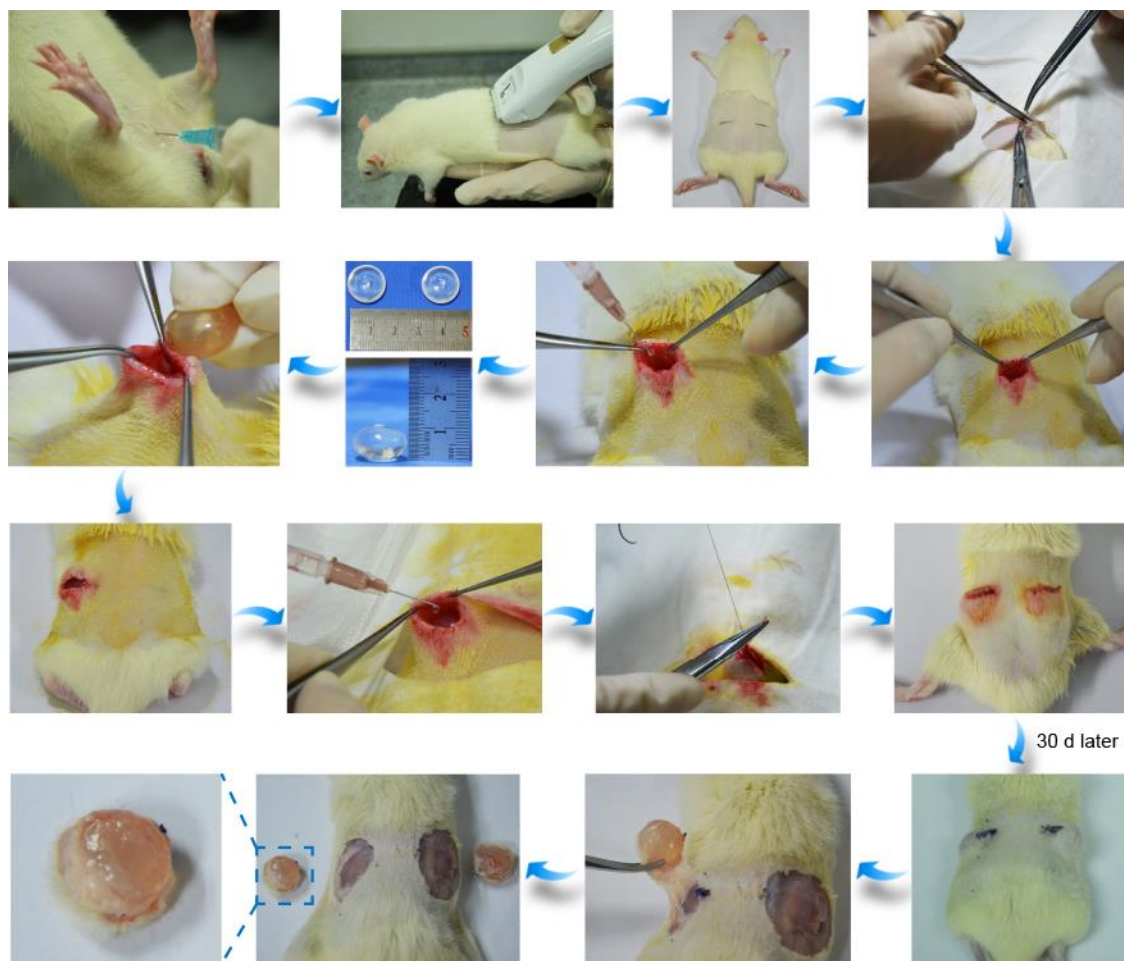

**Figure S2.** In vivo experimental procedures to investigate the capsular formation around silicone implants with an SD rat model.

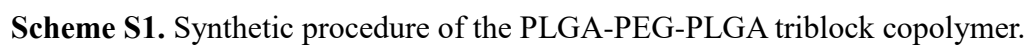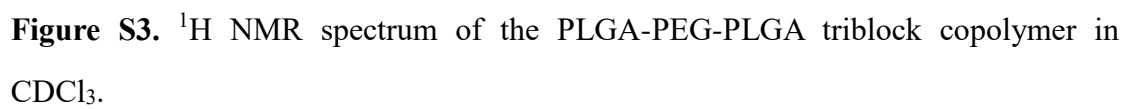

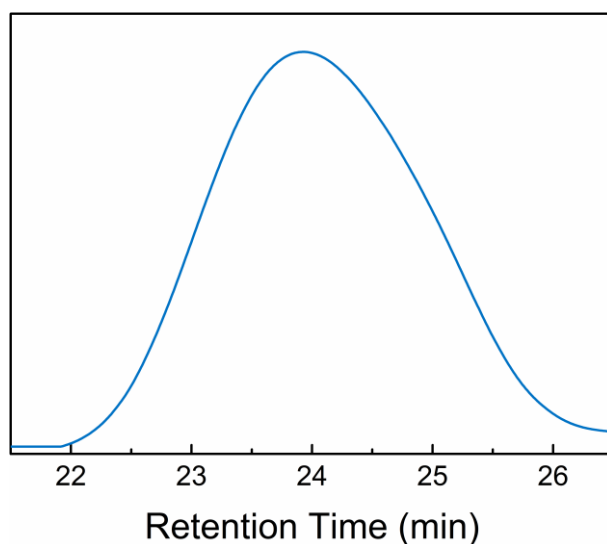

**Figure S4.** GPC trace of the synthesized PLGA-PEG-PLGA triblock copolymer.

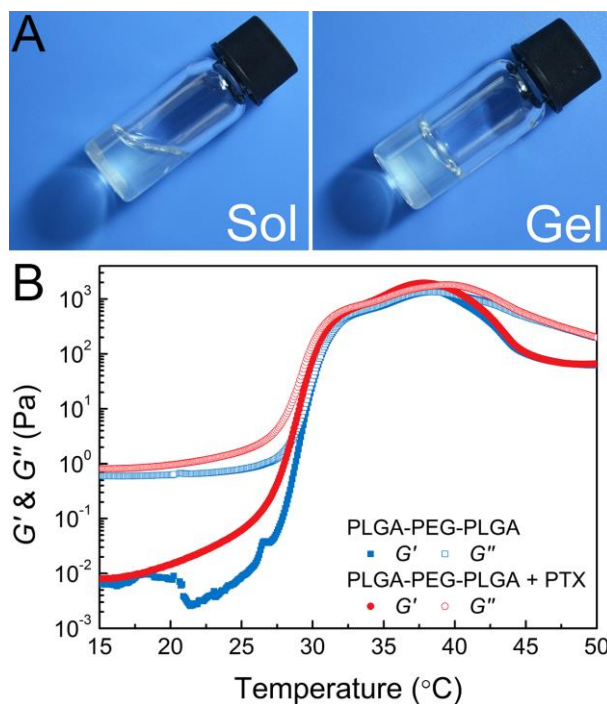

**Figure S5.** (A) Photographs of the PLGA-PEG-PLGA triblock copolymers in NS (25 wt %) containing 40  $\mu\text{g/mL}$  PTX exhibiting sol (22  $^{\circ}\text{C}$ ) and gel states (37  $^{\circ}\text{C}$ ). (B) Storage modulus  $G'$  and loss modulus  $G''$  of the PLGA-PEG-PLGA triblock copolymers in NS (25 wt %) with or without PTX as a function of temperature. Heating rate of 0.5  $^{\circ}\text{C/min}$  and oscillatory frequency  $\omega$  of 10 rad/s. The drug loading amount was 40  $\mu\text{g/mL}$ .

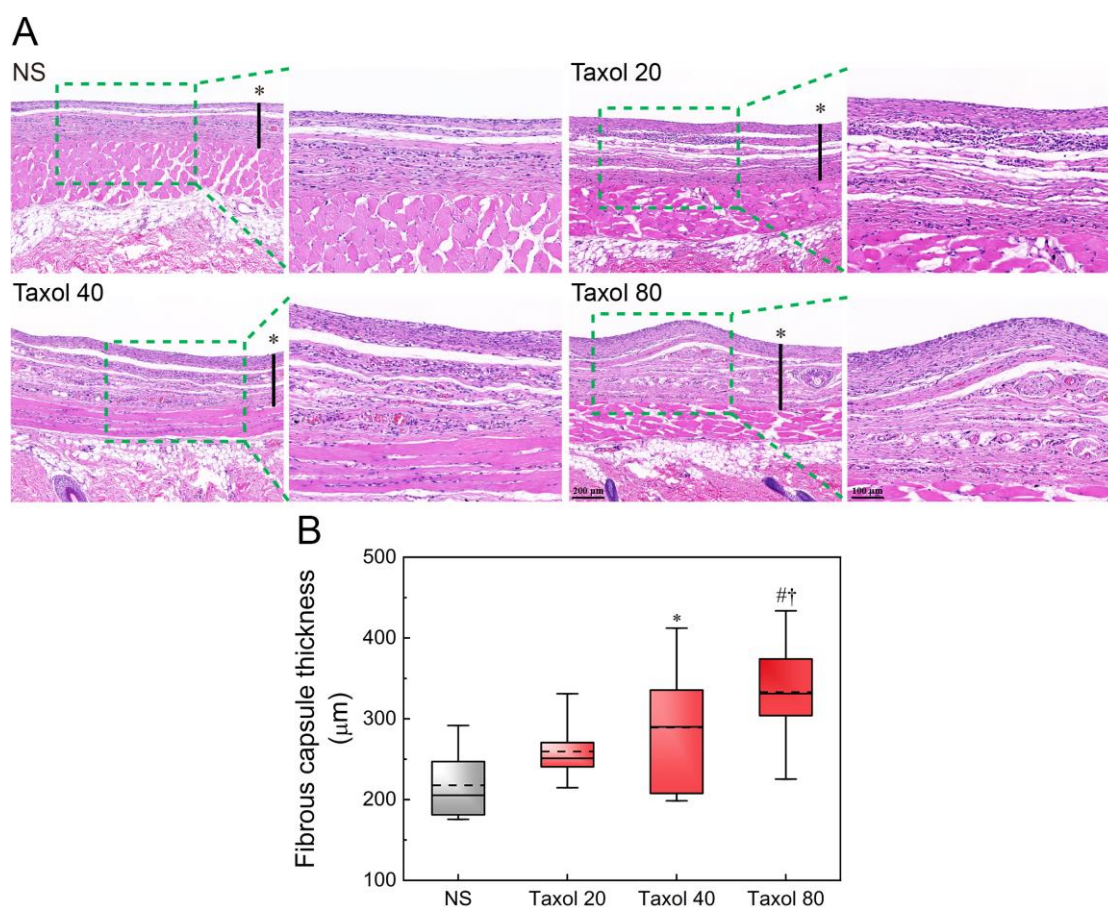

**Figure S6.** (A) Representative histological images using H&E staining of the capsule biopsy specimens taken from the NS (the control) and the Taxol 20, 40, and 80 (the PTX solutions containing 20, 40, and 80  $\mu\text{g}/\text{mL}$  PTX) after 30 days from implantation in the rats. The asterisks (\*) mark the site of the silicone implants and the black bars denote the fibrous capsule. (B) Box-whisker plot of the fibrous capsule thickness around the implants ( $n = 10$ ): minimum, 25th percentile, median (solid line), mean (dashed line), 75th percentile and maximum. NS: the control, Taxol 20, 40, and 80: 20, 40, and 80  $\mu\text{g}/\text{mL}$  PTX solutions diluted from the Taxol solution. ANOVA  $^*p < 0.05$  vs NS,  $^{\#}p < 0.05$  vs NS,  $^{\dagger}p < 0.05$  vs Taxol 20.

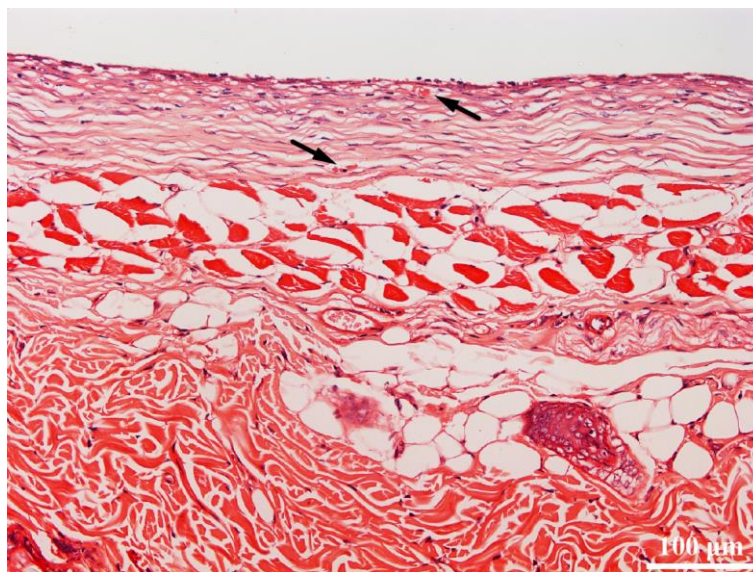

**Figure S7.** Evaluation of the vascularity of the fibrous capsule around the implants.

The black arrows indicate the location of the blood vessels.



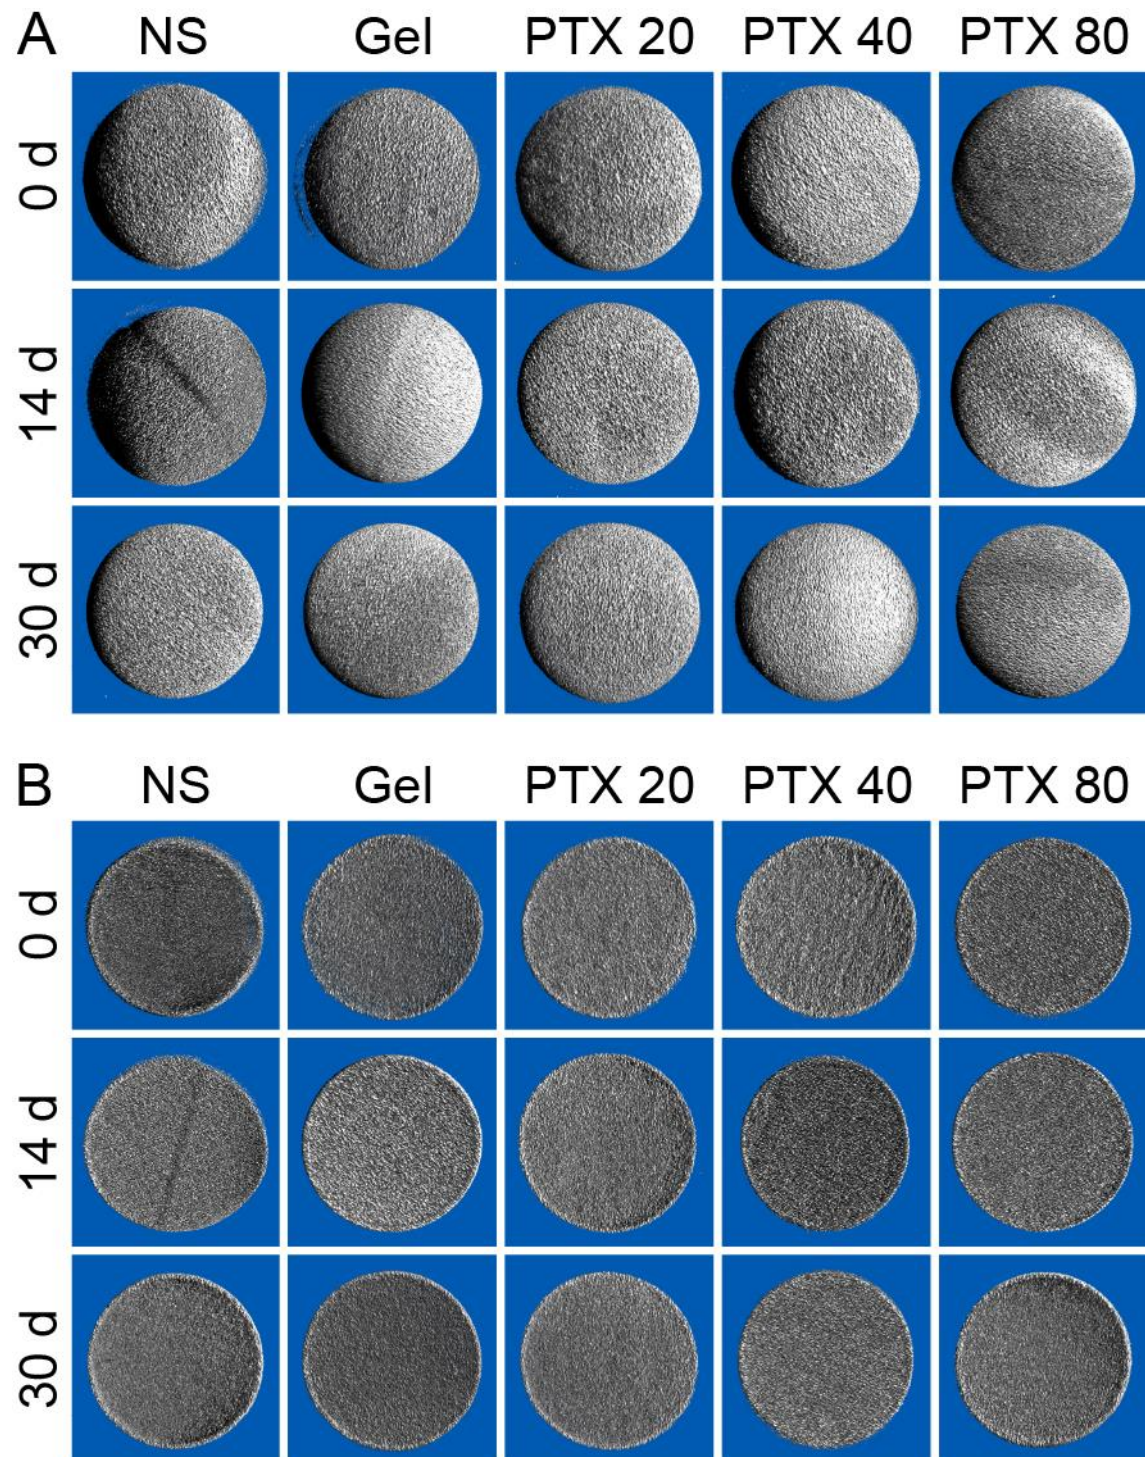

**Figure S8.** In vivo micro-CT images of the implants in the rats at the indicated time points. Representative images of (A) the implants and (B) the transverse sections of the implants. The images tracked the same rat of each group as a function of time.



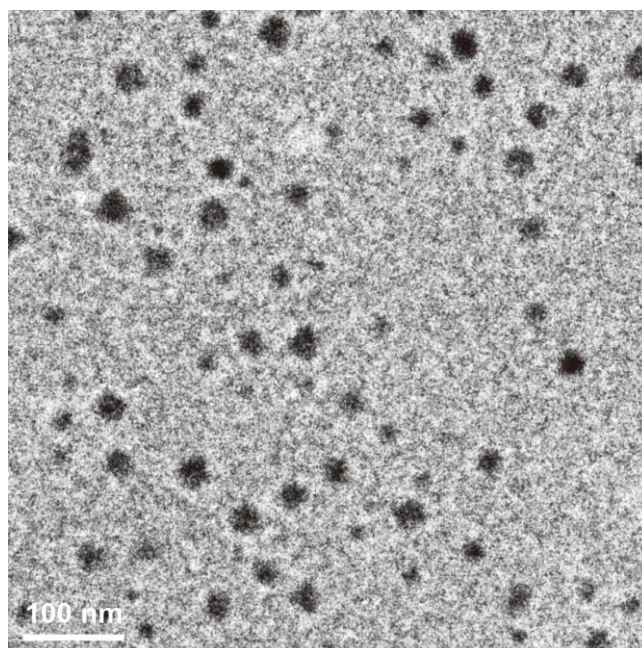

**Figure S9.** TEM image showing the formation of micelles of the PLGA-PEG-PLGA triblock copolymers in NS. The polymer concentration was 1 wt %.

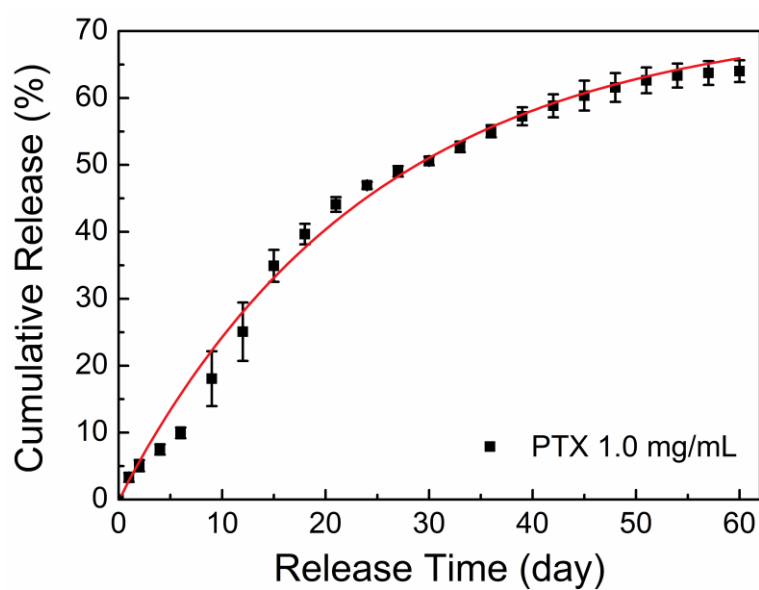

**Figure S10.** In vitro release profile of the PTX from the PLGA-PEG-PLGA thermogel in PBS at 37 °C. The polymer concentration was 25 wt %. The results are presented as mean  $\pm$  SD ( $n = 3$ ). The release profile is fitted via the first-order equation with a correlation coefficient of 0.990.
